# Supplementary material for: Impact of potassium doping on the optoelectronic properties over inorganic and hybrid bismuth bromide perovskite thin films (A3Bi2Br9, A = Cs+, MA)
Source: Royal Society of Chemistry journal article supplement (doi:10.1039/d4nj05274a), 2025-01-01
Supplement: d4nj05274a1.pdf [file d4nj05274a1.pdf]

## Supporting Information

### Impact of Potassium Doping in the Optoelectronic Properties over Inorganic and Hybrid Bismuth Bromide Perovskite Thin Films ( $A_3Bi_2Br_9$ , $A = Cs^+, MA$ )

Deepak Aloysius,<sup>†</sup> Satyajit Gupta<sup>\*†</sup>

<sup>†</sup>Department of Chemistry, Indian Institute of Technology Bhilai, Durg, Chhattisgarh,  
491002

\*Corresponding Author

Email: [satyajit@iitbhilai.ac.in](mailto:satyajit@iitbhilai.ac.in)

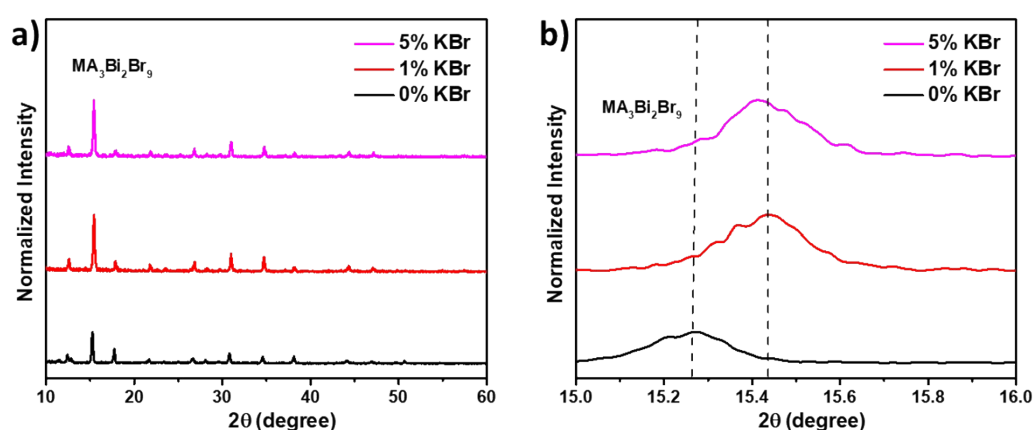

Fig. S1: a) Stacked XRD plot of KBr incorporated  $MA_3Bi_2Br_9$  perovskite thin film compositions b) XRD peak shift of  $MA_3Bi_2Br_9$  perovskite towards higher angle with KBr incorporation.

Table S1: Average grain size of KBr incorporated  $Cs_3Bi_2Br_9$  perovskite thin film compositions.

| Perovskite | Average Grain size ( $\mu\text{m}$ ) |
|------------|--------------------------------------|
| 0% KBr     | $1 \pm 0.2$                          |
| 1% KBr     | $2.37 \pm 0.6$                       |

|               |          |
|---------------|----------|
| <b>5% KBr</b> | 2.59±0.5 |
|---------------|----------|

Table S2: The Electron Dispersive Spectroscopic (EDS) elemental composition of KBr incorporated Cs<sub>3</sub>Bi<sub>2</sub>Br<sub>9</sub> perovskite thin film compositions.

| <b>Atomic percentage</b> | <b>0% KBr</b> | <b>1% KBr</b> | <b>5% KBr</b> | <b>Error %</b> |
|--------------------------|---------------|---------------|---------------|----------------|
| <b>K<sup>+</sup></b>     | nil           | 0.8           | 0.6           | 17.4-19.1      |
| <b>Cs<sup>+</sup></b>    | 19.8          | 19.8          | 19.5          | 7.7-8.4        |
| <b>Bi<sup>3+</sup></b>   | 15.8          | 15.2          | 16.1          | 6              |
| <b>Br<sup>-</sup></b>    | 64.4          | 64.1          | 63.9          | 6.7            |

| Composition | Element | Wavelength (nm) | Concentration (ppm) |
|-------------|---------|-----------------|---------------------|
| 0% KBr      | K       | 766.491         | nil                 |
| 1% KBr      | K       | 766.491         | 5.34                |
| 5% KBr      | K       | 766.491         | 16.81               |

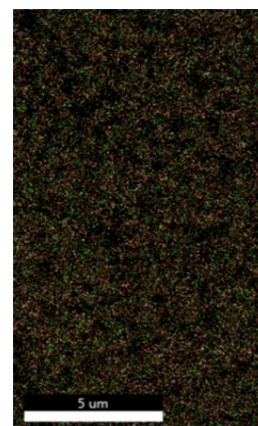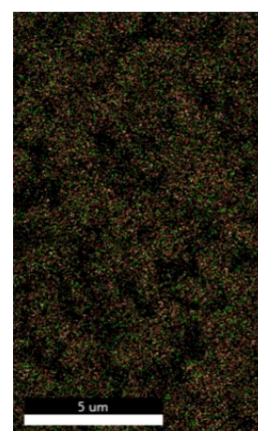

Fig. S2: The Electron Dispersive Spectroscopic (EDS) mapping of KBr incorporated  $\text{Cs}_3\text{Bi}_2\text{Br}_9$  perovskite thin film compositions.

Table S3: ICP-OES data showing the amount of K in all compositions of KBr incorporated  $\text{Cs}_3\text{Bi}_2\text{Br}_9$  perovskites

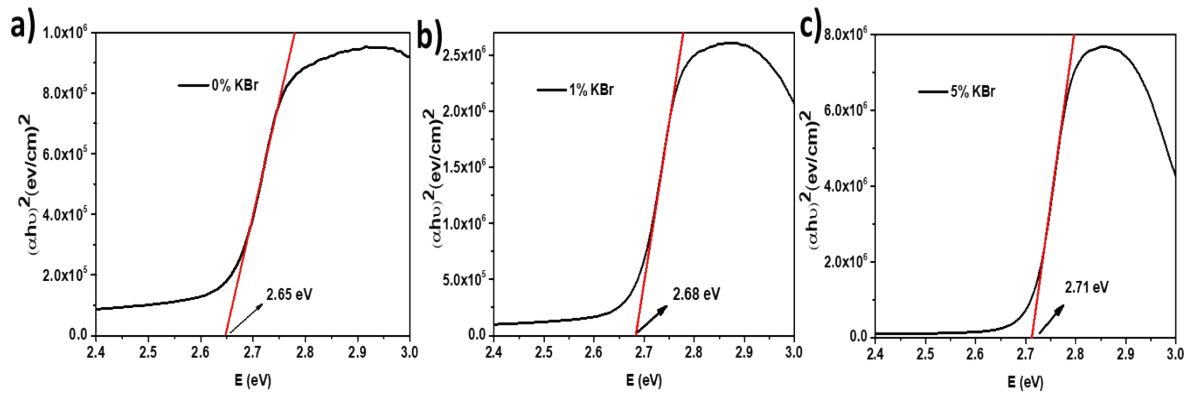

Fig. S3: Tauc plot depicting the direct bandgap of a) 0% KBr, b) 1% KBr, and c) 5% KBr compositions of Cs<sub>3</sub>Bi<sub>2</sub>Br<sub>9</sub> perovskite.

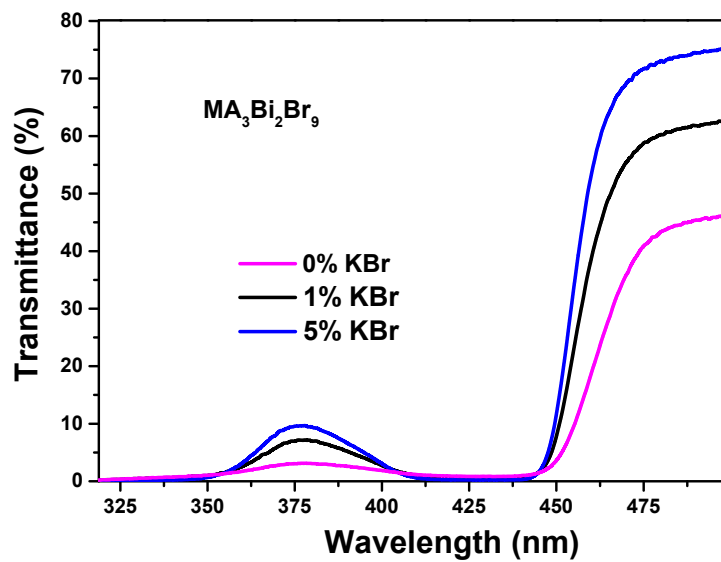

Fig. S4: Transmittance curve of KBr incorporated MA<sub>3</sub>Bi<sub>2</sub>Br<sub>9</sub> perovskite compositions.

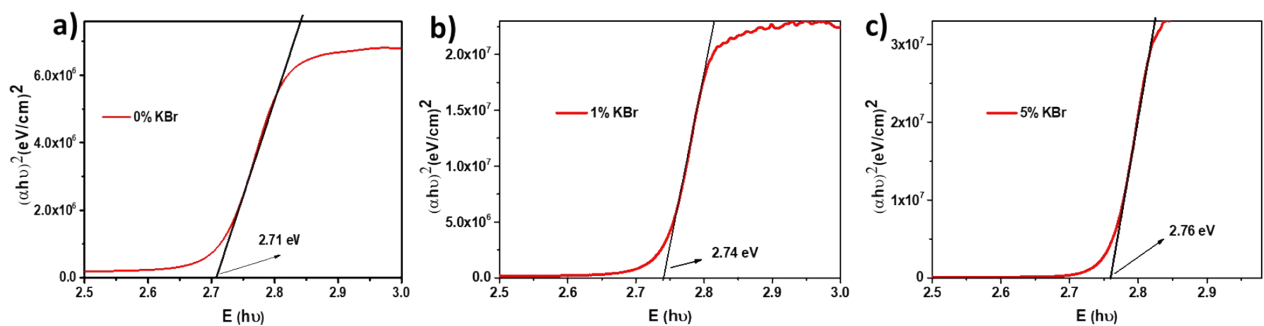

Fig. S5: Tauc plot depicting the direct bandgap of a) 0% KBr, b) 1% KBr, c) 3% KBr and d) 5% KBr compositions of MA<sub>3</sub>Bi<sub>2</sub>Br<sub>9</sub> perovskite

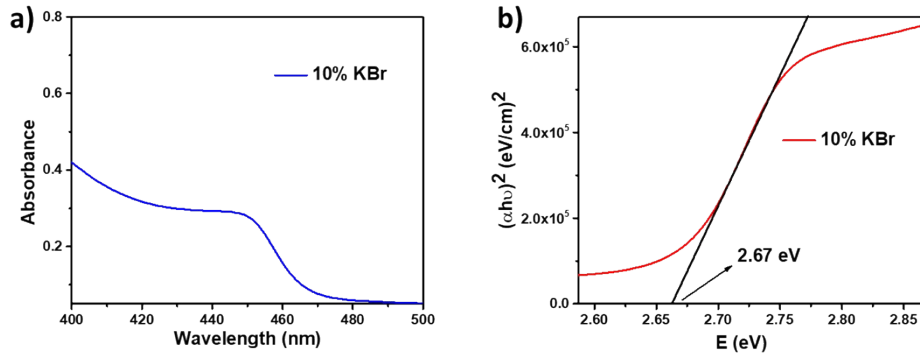

Fig. S6: a) Absorbance and b) Tauc plot showing the bandgap of 10% KBr in incorporated  $\text{Cs}_3\text{Bi}_2\text{Br}_9$  perovskite

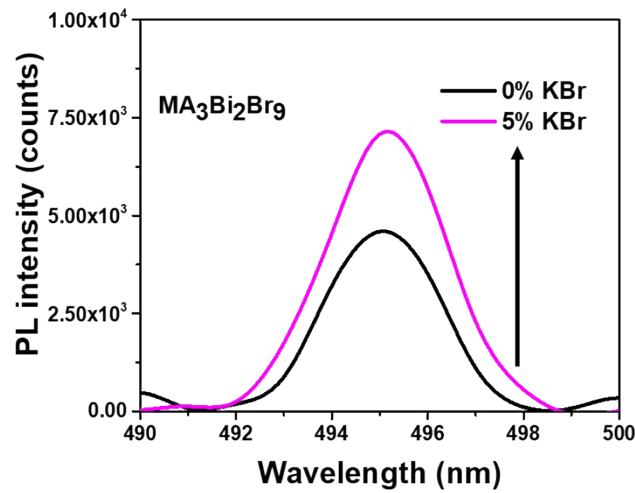

Fig. S7: SSPL curve of 5% KBr incorporated of  $\text{MA}_3\text{Bi}_2\text{Br}_9$  perovskite compositions.

The TRPL curves are fitted using the triexponential decay function

$$\text{i.e., } I(t) = A + B1 e^{\left(-\frac{t}{T1}\right)} + B2 * e^{\left(-\frac{t}{T2}\right)} + B3 * e^{(-t/T3)}$$

where 'I(t)' is the Intensity at Time 't,'

'A' Background Intensity,

[B1, B2, B3] is the amplitudes of the decay component,

[T1, T2, T3] is the lifetimes of the decay components,

$e^{-\frac{t}{Ti}}$ , Exponential Decay Function

The lifetime obtained for different decay components is shown in the table below.

Table S4: Parameters of TRPL decay curve fitting equation.

| $\text{Cs}_3\text{Bi}_2\text{Br}_9$ | A     | B1   | B2    | B3    | T1 (ns) | T2 (ns) | T3 (ns) | Chi-square | Average Lifetime (ps) |
|-------------------------------------|-------|------|-------|-------|---------|---------|---------|------------|-----------------------|
| 0% KBr                              | 13.89 | 9.48 | 26.54 | 63.98 | 1.37    | 9.13    | 0.05    | 1.76       | 76                    |
| 1% KBr                              | 30.99 | 7.83 | 55.59 | 36.58 | 1.05    | 11.91   | 0.03    | 1.35       | 90                    |
| 5% KBr                              | 22.63 | 8.03 | 51.04 | 40.92 | 1.18    | 11.5    | 0.04    | 1.33       | 105                   |

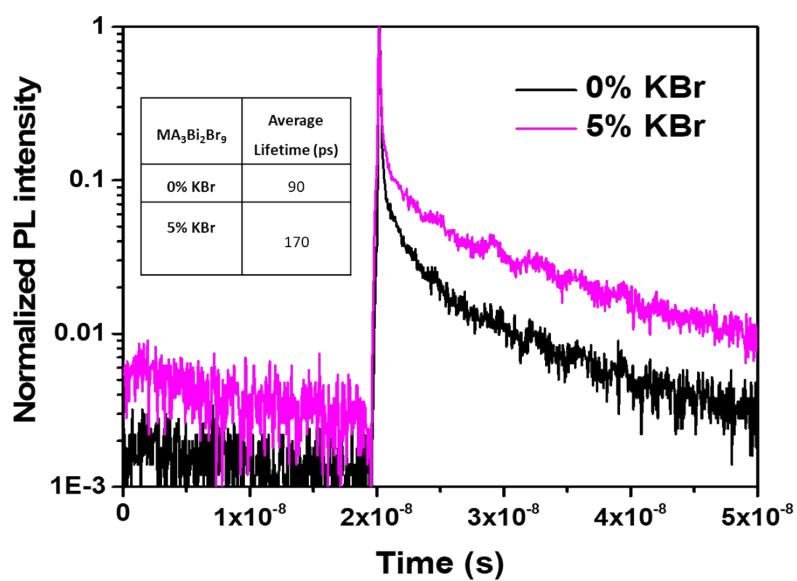

Fig. S8: TRPL curve of 5% KBr incorporated  $\text{MA}_3\text{Bi}_2\text{Br}_9$  perovskite thin films (Average TRPL lifetime of KBr incorporated  $\text{MA}_3\text{Bi}_2\text{Br}_9$  perovskite thin film is shown in the inset).

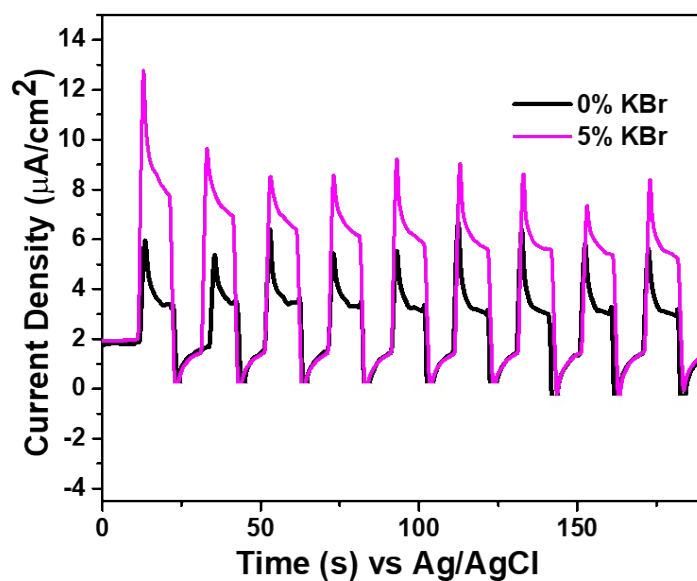

Fig. S9: Chronoamperometry curve of KBr incorporated MA<sub>3</sub>Bi<sub>2</sub>Br<sub>9</sub> perovskite thin films.

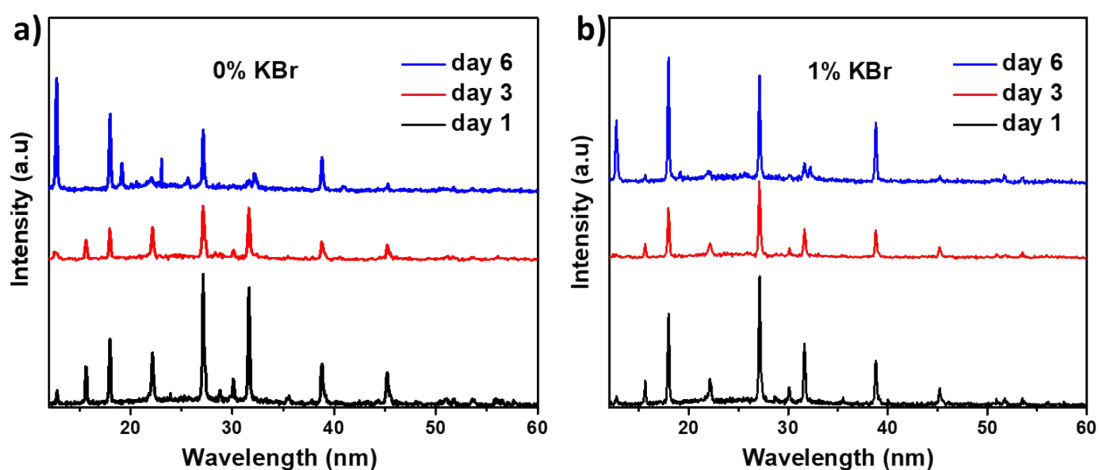

Fig. S10: XRD analysis of a) 0% KBr b) 1% KBr incorporated Cs<sub>3</sub>Bi<sub>2</sub>Br<sub>9</sub> compositions for 6 days within a temperature range of 20°C to 25°C and 75% humidity. (the occurrence of additional peaks on the 6<sup>th</sup> day indicates the degradation of the film)

Fig.

S11:

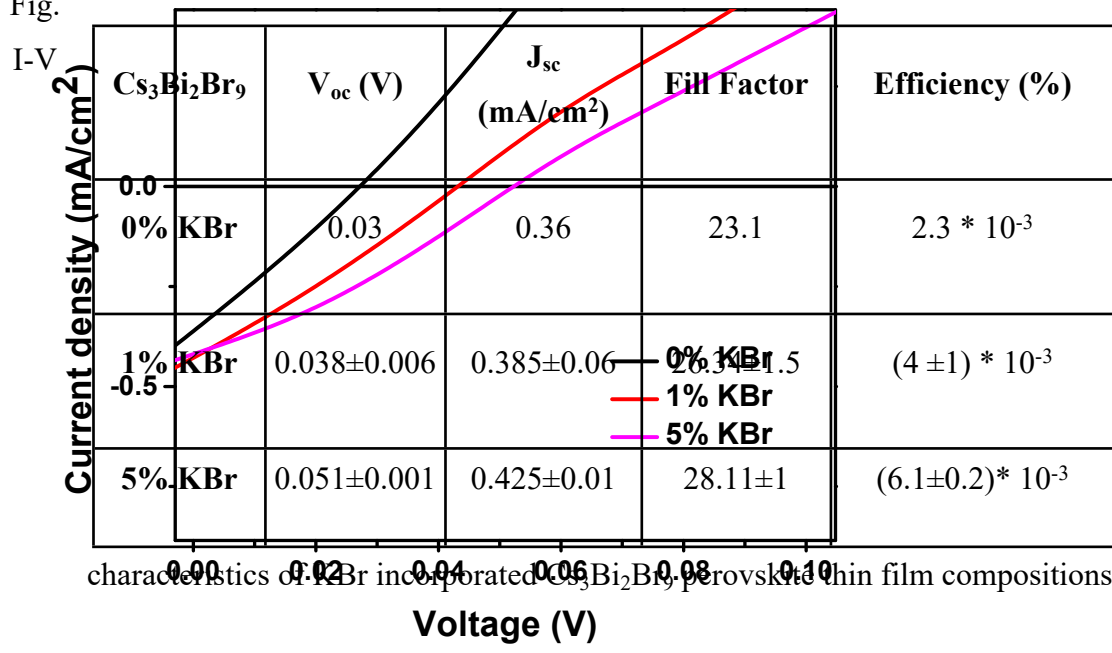

Table S5: Device characteristics of KBr incorporated  $\text{Cs}_3\text{Bi}_2\text{Br}_9$  perovskite solar cell
